# Supplementary material
Source: PubMed Central journal article supplement (PMC7492477)
Supplement: NIHMS1578898-supplement-1.pdf [file NIHMS1578898-supplement-1.pdf]

**Table S1. Description of satisfaction survey items by age groups**

|                                                                                               | Male adolescents<br>and young adults<br>(Age 15-24 years) | Older men<br>(Age ≥ 25 years) |         |
|-----------------------------------------------------------------------------------------------|-----------------------------------------------------------|-------------------------------|---------|
|                                                                                               | n=117                                                     | n=115                         | p-value |
| <b>Quality of the EPIC-HIV application</b>                                                    |                                                           |                               |         |
| Fair                                                                                          | 17 (13.4)                                                 | 12 (11.5)                     | 0.78    |
| Good                                                                                          | 61 (48.0)                                                 | 47 (45.2)                     |         |
| Excellent                                                                                     | 49 (38.6)                                                 | 45 (43.3)                     |         |
| <b>The app helped in meeting your needs with regards to information on HIV</b>                |                                                           |                               |         |
| None of or only few of my needs has been met                                                  | 23 (18.0)                                                 | 13 (12.5)                     | 0.53    |
| Most of my needs have been met                                                                | 53 (41.4)                                                 | 45 (43.3)                     |         |
| All of my needs have been met                                                                 | 52 (40.6)                                                 | 46 (44.2)                     |         |
| <b>Getting the kind of HIV information wanted or expected</b>                                 |                                                           |                               |         |
| No definitely or not really                                                                   | 10 ( 7.8)                                                 | 6 ( 6.0)                      | 0.84    |
| Yes generally                                                                                 | 59 (46.1)                                                 | 45 (45.0)                     |         |
| Yes definitely                                                                                | 59 (46.1)                                                 | 49 (49.0)                     |         |
| <b>Feeling empowered</b>                                                                      |                                                           |                               |         |
| No                                                                                            | 4 ( 3.1)                                                  | 2 ( 1.9)                      | 0.68    |
| Yes I think so                                                                                | 81 (63.3)                                                 | 62 (59.6)                     |         |
| Yes definitely                                                                                | 43 (33.6)                                                 | 40 (38.5)                     |         |
| <b>If a friend were in need of HIV testing information, whether to recommend the EPIC app</b> |                                                           |                               |         |
| No                                                                                            | 1 ( 0.8)                                                  | 3 ( 2.9)                      | 0.36    |
| Yes I think so                                                                                | 61 (48.8)                                                 | 44 (42.7)                     |         |
| Yes definitely                                                                                | 63 (50.4)                                                 | 56 (54.4)                     |         |
| <b>Satisfaction with the amount of HIV testing information received in the application</b>    |                                                           |                               |         |
| Quite or mostly dissatisfied                                                                  | 5 ( 3.9)                                                  | 0 ( 0.0)                      | 0.06    |
| Mostly Satisfied                                                                              | 74 (57.8)                                                 | 53 (52.0)                     |         |
| Very satisfied                                                                                | 49 (38.3)                                                 | 49 (48.0)                     |         |
| <b>Simplicity and user-friendliness of the app</b>                                            |                                                           |                               |         |
| Poor or Fair                                                                                  | 25 (19.7)                                                 | 27 (26.0)                     | 0.22    |
| Good                                                                                          | 52 (40.9)                                                 | 47 (45.2)                     |         |
| Excellent                                                                                     | 50 (39.4)                                                 | 30 (28.8)                     |         |
| <b>Overall satisfaction with the app</b>                                                      |                                                           |                               |         |
| Quite or mostly dissatisfied                                                                  | 3 ( 2.3)                                                  | 6 ( 5.8)                      | 0.28    |
| Mostly Satisfied                                                                              | 77 (60.2)                                                 | 55 (52.9)                     |         |
| Very satisfied                                                                                | 48 (37.5)                                                 | 43 (41.3)                     |         |
| <b>Willigness to reuse the app for HIV information</b>                                        |                                                           |                               |         |

|     |            |            |              |
|-----|------------|------------|--------------|
| No  | 16 (12.5)  | 1 ( 1.0)   | <b>0.001</b> |
| Yes | 112 (87.5) | 103 (99.0) |              |

---
